# Supplementary material for: CO2 turned into a nitrogen doped carbon catalyst for fuel cells and metal–air battery applications
Source: Royal Society of Chemistry journal article supplement (doi:10.1039/d1gc00659b), 2021-01-01
Supplement: d1gc00659b1.pdf [file d1gc00659b1.pdf]

**Electronic Supplementary Information**  
**For**  
**A nitrogen-doped carbon catalyst for the oxygen reduction reaction made**  
**from CO<sub>2</sub>**

Sander Ratso<sup>a</sup>, Peter Robert Walke<sup>c</sup>, Valdek Mikli<sup>c</sup>, Jānis Ločs,<sup>d</sup> Krišjānis Šmits,<sup>e</sup> Virgīnija  
Vītola,<sup>e</sup> Andris Šutka<sup>b</sup>, Ivar Kruusenberg<sup>a\*</sup>

<sup>a</sup> *National Institute of Chemical Physics and Biophysics, Akadeemia Tee 23, Tallinn 12618, Estonia*

<sup>b</sup> *Research Laboratory of Functional Materials Technologies, Faculty of Materials Science and  
Applied Chemistry, Riga Technical University, Paula Valdena 3/7, 1048 Riga, Latvia*

<sup>c</sup> *Department of Materials and Environmental Technology, Tallinn University of Technology,  
Ehitajate tee 5, 19086 Tallinn, Estonia*

<sup>d</sup> *Rudolfs Cimdins Riga Biomaterials Innovations and Development Centre of RTU, Institute of  
General Chemical Engineering, Faculty of Materials Science and Applied Chemistry, Riga Technical  
University, Pulka 3, 1007 Riga, Latvia*

<sup>e</sup> *Institute of Physics, University of Tartu, W. Ostwaldi Street 1, 50411, Tartu, Estonia*

---

\* Corresponding author. E-mail address: [ivar.kruusenberg@kbfi.ee](mailto:ivar.kruusenberg@kbfi.ee) (I. Kruusenberg).

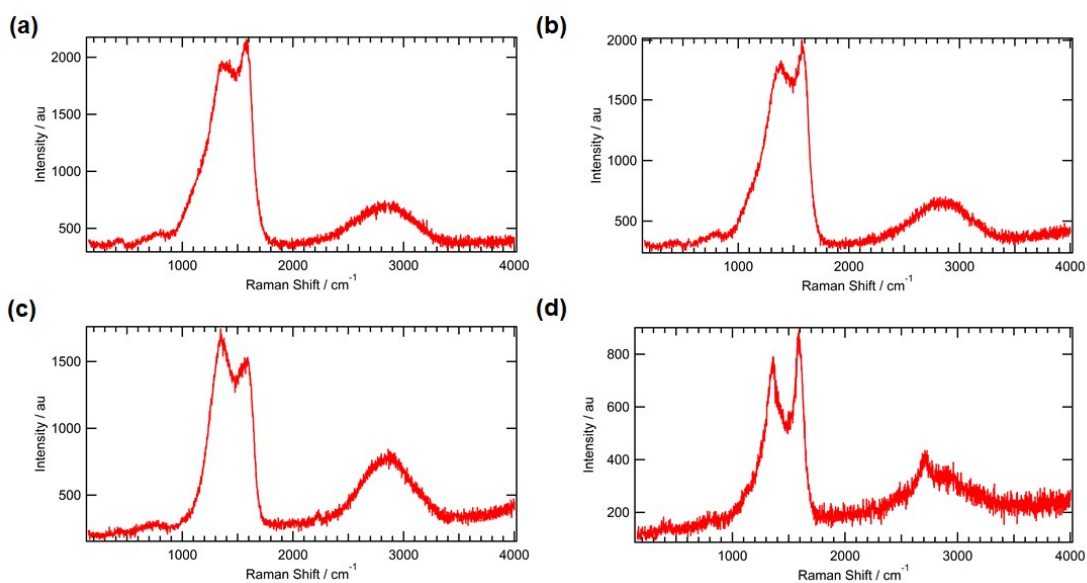

**Figure S1.** (a-c) Raman spectra for the CO2-1, CO2-2 and CO2-3 samples, respectively. (d-f) Corresponding Raman spectra for the CO2-1-N, CO2-2-N and CO2-3-N systems.

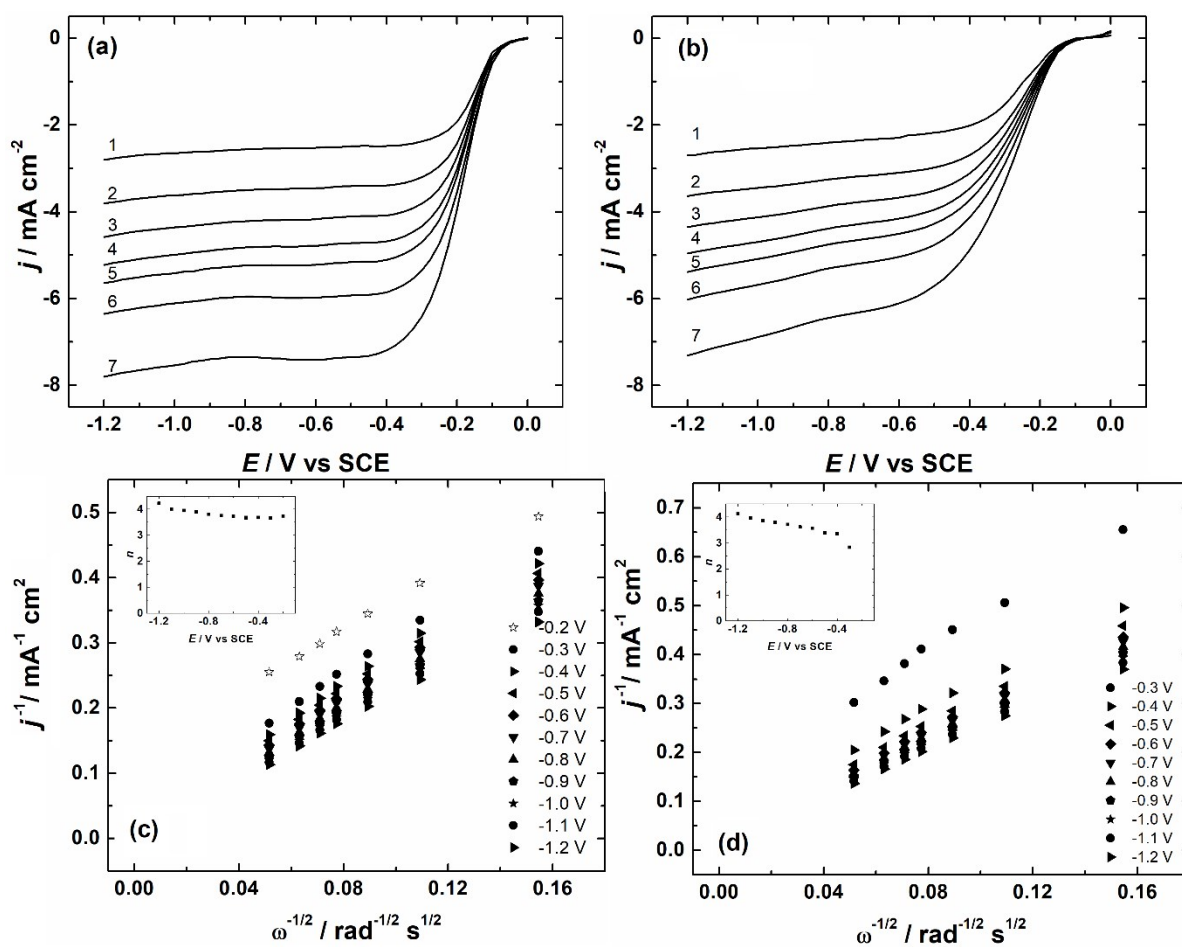

**Figure S2.** ORR polarisation curves from GC electrodes modified with the (a) CO2-1-N and (b) CO2-2-N material recorded in O<sub>2</sub>-saturated 0.1 M KOH and Koutecky-Levich plots (c,d) calculated from the ORR data with the number of electrons transferred per O<sub>2</sub> molecule ( $n$ ) in the inset.  $\nu = 1.67 \text{ mV s}^{-1}$ ,  $\omega =$  (1) 400, (2) 800, (3) 1200, (4) 1600, (5) 1900, (6) 2400 and (7) 3600 rpm.
